# Supplementary material for: Cytpchrome P450 CYP4G68 Is Associated with Imidacloprid and Thiamethoxam Resistance in Field Whitefly, Bemisia tabaci (Hemiptera: Gennadius)
Source: MDPI journal article supplement (doi:10.3390/agriculture12040473), 2022-03-27
Supplement: s1 [file s1]

**Supplementary Materials:**

**Table S1.** Origins of the *B. tabaci* strains used in this study.

| Strains name    | Sampling location   | Sampling location longitude and latitude | Sampling date | Host plant   | B.tabaci species | Strains type |
|-----------------|---------------------|------------------------------------------|---------------|--------------|------------------|--------------|
| S <sup>#1</sup> | Hangzhou, Zhejiang  | (30°20'N, 120°38'E)                      | 2011.08       | Tomato       | MED/Q            | Laboratory   |
| S <sup>#2</sup> | Jingzhou, Hubei     | (30°35'N, 112°15'E)                      | 2020.09       | Sweet potato | MED/Q            | Field        |
| R <sup>#1</sup> | Hangzhou, Zhejiang  | (30°20'N, 120°38'E)                      | 2011.08       | Tomato       | MED/Q            | Laboratory   |
| R <sup>#2</sup> | Hangzhou, Zhejiang  | (30°20'N, 120°38'E)                      | 2011.08       | Tomato       | MED/Q            | Laboratory   |
| R <sup>#3</sup> | Shiyan, Hubei       | (32°61'N, 110°74'E)                      | 2019.12       | Eggplant     | MED/Q            | Field        |
| R <sup>#4</sup> | Zhangzhou, Fujian   | (24°51'N, 117°59'E)                      | 2019.09       | Eggplant     | MED/Q            | Field        |
| R <sup>#5</sup> | Shouguang, Shandong | (37°01'N, 118°51'E)                      | 2020.06       | Pepper       | MED/Q            | Field        |
| R <sup>#6</sup> | Yanqing, Beijing    | (40°38'N, 116°33'E)                      | 2020.07       | Tomato       | MED/Q            | Field        |
| R <sup>#7</sup> | Sanya, Hainan       | (18°09'N, 108°56'E)                      | 2021.04       | Eggplant     | MED/Q            | Field        |
| R <sup>#8</sup> | Sansha, Hainan      | (16°34'N, 112°44'E)                      | 2019.03       | Eggplant     | MED/Q            | Field        |

**Table S2.** Primers used in this study.

| Primer name                        | Primer sequence (5'-3')                     | Product | Purpose              |
|------------------------------------|---------------------------------------------|---------|----------------------|
| <i>CYP4G68</i> -ORF-F <sup>a</sup> | ATGCTCGAGTTCCTAATTTGC                       | 1764 bp | Gene clone           |
| <i>CYP4G68</i> -ORF-R <sup>b</sup> | CTAATTCGCTGTAGCCACCGTT                      |         |                      |
| q <i>CYP4G68</i> -F                | GGTGTATCATGGAGACTCT                         | 75 bp   | qRT-PCR <sup>c</sup> |
| q <i>CYP4G68</i> -R                | GCTGGACTTCTTGTTGTAG                         |         |                      |
| <i>EF-1α</i> -F                    | TAGCCTTG TGCCAATTTCCG                       | 110 bp  | qRT-PCR              |
| <i>EF-1α</i> -R                    | CCTTCAGCATTACCGTCC                          |         |                      |
| <i>RPL29</i> -F                    | TCGGAAAATTACCGTGAG                          | 144 bp  | qRT-PCR              |
| <i>RPL29</i> -R                    | GAAC TTGTGATCTACTCCTCTCGTG                  |         |                      |
| ds <i>CYP4G68</i> -F               | TAATACGACTCACTATAGGGAGACGTCGAGATCATTTTGAGCA | 405 bp  | RNAi                 |
| ds <i>CYP4G68</i> -R               | TAATACGACTCACTATAGGGAGAAAATCTGGTCGCATCCAAAC |         |                      |
| ds <i>EGFP</i> -F                  | TAATACGACTCACTATAGGGAGACAGTGCTTCAGCCGCTAC   | 288 bp  | RNAi                 |
| ds <i>EGFP</i> -R                  | TAATACGACTCACTATAGGGAGAGTTCACCTTGATGCCGTTT  |         |                      |

<sup>a</sup>F = Forward primer; <sup>b</sup>R = Reverse primer; <sup>c</sup>qRT-PCR = The primers refer to Wang *et al* [48], and amplification efficiency of the primers is 98.60%.
